# Supplementary material for: New Insights into Hemopexin-Binding to Hemin and Hemoglobin
Source: MDPI journal article supplement (doi:10.3390/ijms23073789), 2022-03-30

# New insights on hemopexin binding to Hemin and hemoglobin

Guilherme C. Lechuga<sup>1,2</sup> Paloma Napoleão-Pêgo<sup>1</sup>, Carlos M. Morel<sup>1</sup>, David W. Provance, Jr<sup>1</sup>, Salvatore G. De-Simone<sup>1,4,\*</sup>

## – Supplementary Information –

**Table S1: Linear mapping of hemopexin interaction with hemin and hemoglobin in the SPOT synthesis array (15 residues with overlapping of 10). Signal intensity of interaction regions of hemopexin sequences. Each peptide was identified by the Spot-synthesis membrane position numbering. Spot intensities below 50% were considered as background.**

| Spot | Peptide Sequence | Signal | Interaction sites | Molecule |
|------|------------------|--------|-------------------|----------|
| A1   | MARVLGAPVALGLWS  | 0      |                   | Hemin    |
| A2   | GAPVALGLWSLCWSL  | 0      |                   | Hemin    |
| A3   | LGLWSLCWSLAIATP  | 0      |                   | Hemin    |
| A4   | LCWSLAIATPLPPTS  | 0,54   |                   | Hemin    |
| A5   | AIATPLPPTSAHGNV  | 40,02  |                   | Hemin    |
| A6   | LPPTSAHGNVAEGET  | 6,65   |                   | Hemin    |
| A7   | AHGNVAEGETKPDPD  | 1,67   |                   | Hemin    |
| A8   | AEGETKPDVTERC    | 0      |                   | Hemin    |
| A9   | KPDVTERCSDGWS    | 0      |                   | Hemin    |
| A10  | VTERCSDGWSFDATT  | 0      |                   | Hemin    |
| A11  | SDGWSFDATTLDDNG  | 0      |                   | Hemin    |
| A12  | FDATTLDDNGTMLFF  | 2,35   |                   | Hemin    |
| A13  | LDDNGTMLFFKGEFV  | 0,09   |                   | Hemin    |
| A14  | TMLFFKGEFVWKSHK  | 35,08  |                   | Hemin    |
| A15  | KGEFVWKSHKWDREL  | 46,81  |                   | Hemin    |
| A16  | WKSHKWDRELISERW  | 26,83  |                   | Hemin    |
| A17  | WDRELISERWKNFPS  | 12,88  |                   | Hemin    |
| A18  | ISERWKNFPSVDAA   | 2,36   |                   | Hemin    |
| A19  | KNFPSVDAAFRQGH   | 87,53  | KNFPSVDAAFRQGH    | Hemin    |
| A20  | PVDAAFRQGHNSVFL  | 28,92  |                   | Hemin    |
| A21  | FRQGHNSVFLIKGDK  | 59,85  | FRQGHNSVFL        | Hemin    |
| A22  | NSVFLIKGDKVWVYP  | 5,77   |                   | Hemin    |
| A23  | IKGDKVWVYPPEKKE  | 1,21   |                   | Hemin    |
| A24  | VWVYPPEKKEKGYPK  | 1,13   |                   | Hemin    |
| B1   | PEKKEKGYPKLLQDE  | 0,05   |                   | Hemin    |
| B2   | KGYPKLLQDEFPGIP  | 0,12   |                   | Hemin    |

|     |                          |       |                    |       |
|-----|--------------------------|-------|--------------------|-------|
| B3  | LLQDEFPGIPSPLDA          | 0,09  |                    | Hemin |
| B4  | FPGIPSPLDAAVECH          | 2,35  |                    | Hemin |
| B5  | SPLDAAVECHRGECQ          | 0,13  |                    | Hemin |
| B6  | AVECHRGECQAEGVL          | 0,39  |                    | Hemin |
| B7  | RGECQAEGVLFFQGD          | 0     |                    | Hemin |
| B8  | AEGVLFFQGDREWW           | 0     |                    | Hemin |
| B9  | FFQGDREWWDLATG           | 0     |                    | Hemin |
| B10 | REWWDLATGTMKER           | 0,34  |                    | Hemin |
| B11 | DLATGTMKERSWPAV          | 0     |                    | Hemin |
| B12 | TMKERSWPAVGNCSS          | 0     |                    | Hemin |
| B13 | SWPAVGNCSSALRWL          | 6,61  |                    | Hemin |
| B14 | GNCSSALRWLGYYC           | 0,17  |                    | Hemin |
| B15 | ALRWLGYYCFQGNQ           | 1,72  |                    | Hemin |
| B16 | GRYYCFQGNQFLRFD          | 1,79  |                    | Hemin |
| B17 | FQGNQFLRFDPVGE           | 14,92 |                    | Hemin |
| B18 | FLRFDPVGEVPPRY           | 8,19  |                    | Hemin |
| B19 | PVGEVPPRYPRDVR           | 6,09  |                    | Hemin |
| B20 | VPPRYPRDVRDYFMP          | 2,56  |                    | Hemin |
| B21 | PRDVRDYFMPCGRG           | 6,9   |                    | Hemin |
| B22 | DYFMP <b>CPGRGHGHRN</b>  | 36,9  |                    | Hemin |
| B23 | <b>CPGRGHGHRN</b> GTGHG  | 28,47 |                    | Hemin |
| B24 | HGHRNGTGHGNSTHH          | 27,56 |                    | Hemin |
| C1  | GTGHGNSTHHGPEYM          | 7,9   |                    | Hemin |
| C2  | NSTHHGPEYMRCSPH          | 32,91 |                    | Hemin |
| C3  | GPEYMRCSPHLVLSA          | 23,89 |                    | Hemin |
| C4  | RCSPHLVLSALTSDN          | 27,56 |                    | Hemin |
| C5  | LVLSALTSDNHGATY          | 9,33  |                    | Hemin |
| C6  | LTSDNHGATYAFSGT          | 2,27  |                    | Hemin |
| C7  | HGATYAFSGTHYWRL          | 19,83 |                    | Hemin |
| C8  | AFSGTHYWRLDTSRD          | 23,78 |                    | Hemin |
| C9  | HYWRLDTSRDGWHWS          | 17,3  |                    | Hemin |
| C10 | DTSRD <b>GWHSWP</b> IAHQ | 48,07 |                    | Hemin |
| C11 | <b>GWHSWP</b> IAHQWPQGP  | 51,32 | <b>GWHSWP</b> IAHQ | Hemin |
| C12 | PIAHQWPQGSAVDA           | 2,45  |                    | Hemin |
| C13 | WPQGSAVDAAFSWE           | 3,79  |                    | Hemin |
| C14 | SAVDAAFSWEEKLYL          | 0     |                    | Hemin |
| C15 | AFSWEEKLYLVQGTQ          | 0     |                    | Hemin |
| C16 | EKLYLVQGTQVYVFL          | 2,94  |                    | Hemin |
| C17 | VQGTQVYVFLTKGGY          | 5,19  |                    | Hemin |
| C18 | VYVFLTKGGYTLVSG          | 2,51  |                    | Hemin |
| C19 | TKGGYTLVSGYPKRL          | 4,21  |                    | Hemin |
| C20 | TLVSGYPKRLEKEVG          | 0,85  |                    | Hemin |
| C21 | YPKRLEKEVGTPHGI          | 18,24 |                    | Hemin |
| C22 | EKEVGTPHGIILDSV          | 23,41 |                    | Hemin |
| C23 | TPHGIILDSVDAAFI          | 8,3   |                    | Hemin |

|     |                         |       |                             |            |
|-----|-------------------------|-------|-----------------------------|------------|
| C24 | ILDSVDAAFICPGSS         | 0,05  |                             | Hemin      |
| D1  | DAAFI <b>CPGSSRLHIM</b> | 95,62 |                             | Hemin      |
| D2  | <b>CPGSSRLHIMAGRRL</b>  | 100   | <b>CPGSSRLHIMAGRRL</b>      | Hemin      |
| D3  | <b>RLHIMAGRRL</b> WWLDL | 35,78 |                             | Hemin      |
| D4  | AGRRLWWLDLKSGAQ         | 12,88 |                             | Hemin      |
| D5  | WWLDLKSGAQATWTE         | 0,27  |                             | Hemin      |
| D6  | <b>KSGAQATWTELPWPH</b>  | 100   | <b>KSGAQATWTELPWPH</b>      | Hemin      |
| D7  | ATWTELPWPHEKVDG         | 34,34 |                             | Hemin      |
| D8  | LPWPHEKVDGALCME         | 0,51  |                             | Hemin      |
| D9  | EKVDGALCMEKSLGP         | 0     |                             | Hemin      |
| D10 | ALCMEKSLGPNSCSA         | 0,93  |                             | Hemin      |
| D11 | KSLGPNSCSANGPGL         | 2,89  |                             | Hemin      |
| D12 | <b>NSCSANGPGLYLIHG</b>  | 49,3  | <b>NSCSANGPGLYLIHG</b>      | Hemin      |
| D13 | NGPGLYLIHGPNLYC         | 20,55 |                             | Hemin      |
| D14 | YLIHGPNLYCYS DVE        | 0     |                             | Hemin      |
| D15 | PNLYCYS DVEKLNAA        | 0     |                             | Hemin      |
| D16 | YSDVEKLNAAKALPQ         | 8,86  |                             | Hemin      |
| D17 | KLNAAKALPQPQNV T        | 4,72  |                             | Hemin      |
| D18 | KALPQPQNV TSLG C        | 0     |                             | Hemin      |
| D19 | <b>LPQPQNV TSLG CTH</b> | 67,03 | <b>LPQPQNV TSLG CTH</b>     | Hemin      |
| A1  | <b>MARVLGAPVALGLWS</b>  | 97,21 |                             | Hemoglobin |
| A2  | <b>GAPVALGLWSLCWSL</b>  | 81,13 | <b>MARVLGAPVALGLWSLCWSL</b> | Hemoglobin |
| A3  | <b>LGLWSLCWSL</b> AIATP | 63,04 |                             | Hemoglobin |
| A4  | <b>LCWSL</b> AIATPLPPTS | 62,3  |                             | Hemoglobin |
| A5  | AIATPLPPTSAHGNV         | 6,04  |                             | Hemoglobin |
| A6  | LPPTSAHGNVAEGET         | 26,14 |                             | Hemoglobin |
| A7  | AHGNVAEGETKPD P         | 19,04 |                             | Hemoglobin |
| A8  | AEGETKPD P VTERC        | 6,26  |                             | Hemoglobin |
| A9  | KPD P VTERCSDGWS        | 11,88 |                             | Hemoglobin |
| A10 | VTERCSDGWSFDATT         | 20,5  |                             | Hemoglobin |
| A11 | SDGWSFDATTLD DNG        | 13,57 |                             | Hemoglobin |
| A12 | FDATTLD DNGTMLFF        | 16,54 |                             | Hemoglobin |
| A13 | LDDNGTMLFFKGEFV         | 4,53  |                             | Hemoglobin |
| A14 | TMLFFKGEFVWKSHK         | 18,13 |                             | Hemoglobin |
| A15 | KGEFVWKSHKWDREL         | 48,92 |                             | Hemoglobin |
| A16 | WKSHKWDRELISERW         | 33,94 |                             | Hemoglobin |
| A17 | WDRELISERWKNFPS         | 27,82 |                             | Hemoglobin |
| A18 | ISERWKNFPSVDAA          | 17,75 |                             | Hemoglobin |
| A19 | KNFPSVDAAFRQGH          | 15,78 |                             | Hemoglobin |
| A20 | PVDAAFRQGHNSVFL         | 16,74 |                             | Hemoglobin |
| A21 | FRQGHNSVFLIKGDK         | 16,11 |                             | Hemoglobin |
| A22 | NSVFLIKGDKVWVYP         | 5,82  |                             | Hemoglobin |
| A23 | IKGDKVWVYPPEKKE         | 8,37  |                             | Hemoglobin |
| A24 | VWVYPPEKKEKGYPK         | 7,86  |                             | Hemoglobin |
| B1  | PEKKEKGYPKLLQDE         | 38,22 |                             | Hemoglobin |

|     |                  |       |                                 |            |
|-----|------------------|-------|---------------------------------|------------|
| B2  | KGYPKLLQDEFPGIP  | 26,9  |                                 | Hemoglobin |
| B3  | LLQDEFPGIPSPLDA  | 48,4  |                                 | Hemoglobin |
| B4  | FPGIPSPLDAAVECH  | 39,86 |                                 | Hemoglobin |
| B5  | SPLDAAVECHRGECQ  | 25,56 |                                 | Hemoglobin |
| B6  | AVECHRGECQAEGVL  | 16,69 |                                 | Hemoglobin |
| B7  | RGECQAEGVLFFQGD  | 68,58 |                                 | Hemoglobin |
| B8  | AEGVLFFQGDREWWF  | 60,58 |                                 | Hemoglobin |
| B9  | FFQGDREWFWDLATG  | 79,47 | FFQGDREWFWDLATG                 | Hemoglobin |
| B10 | REWFWDLATGTMKER  | 61,36 |                                 | Hemoglobin |
| B11 | DLATGTMKERSWPAV  | 1,69  |                                 | Hemoglobin |
| B12 | TMKERSWPAVGNCSS  | 15    |                                 | Hemoglobin |
| B13 | SWPAVGNCSSALRWL  | 39,69 |                                 | Hemoglobin |
| B14 | GNCSSALRWLGYYC   | 25,17 |                                 | Hemoglobin |
| B15 | ALRWLGYYCFQGNQ   | 40,73 |                                 | Hemoglobin |
| B16 | GYYCFQGNQFLRFD   | 36,62 |                                 | Hemoglobin |
| B17 | FQGNQFLRFDPVRGE  | 31,86 |                                 | Hemoglobin |
| B18 | FLRFDPVRGEVPPRY  | 23,55 |                                 | Hemoglobin |
| B19 | PVRGEVPPRYPRDVR  | 23,71 |                                 | Hemoglobin |
| B20 | VPPRYPRDVRDYFMP  | 29,98 |                                 | Hemoglobin |
| B21 | PRDVRDYFMPCPGRG  | 7,81  |                                 | Hemoglobin |
| B22 | DYFMPCPGRGHGHRN  | 16,15 |                                 | Hemoglobin |
| B23 | CPGRGHGHRNGTGHG  | 14,14 |                                 | Hemoglobin |
| B24 | HGHRNGTGHGNSTHH  | 11,4  |                                 | Hemoglobin |
| C1  | GTGHGNSTHHGPEYM  | 31,92 |                                 | Hemoglobin |
| C2  | NSTHHGPEYMRCSPH  | 40,59 |                                 | Hemoglobin |
| C3  | GPEYMRCSPHLVLSA  | 22,58 |                                 | Hemoglobin |
| C4  | RCSPHLVLSALTS DN | 49,21 |                                 | Hemoglobin |
| C5  | LVLSALTS DNHGATY | 74,61 | LVLSALTS DNHGATYAFSGTHYWRLDTSRD | Hemoglobin |
| C6  | LTSDNHGATYAFSGT  | 23,48 |                                 | Hemoglobin |
| C7  | HGATYAFSGTHYWRL  | 73,93 |                                 | Hemoglobin |
| C8  | AFSGTHYWRLDTSRD  | 79,03 |                                 | Hemoglobin |
| C9  | HYWRLDTSRDGWHSW  | 57,45 |                                 | Hemoglobin |
| C10 | DTSRDGWHSWP IAHQ | 31,56 |                                 | Hemoglobin |
| C11 | GWHSWP IAHQWPQGP | 17,75 |                                 | Hemoglobin |
| C12 | PIAHQWPQGPSAVDA  | 17,74 |                                 | Hemoglobin |
| C13 | WPQGPSAVDAAFSWE  | 30,88 |                                 | Hemoglobin |
| C14 | SAVDAAFSWEEKLYL  | 31,19 |                                 | Hemoglobin |
| C15 | AFSWEEKLYLVQGTQ  | 58,62 | AFSWEEKLYLVQGTQ                 | Hemoglobin |
| C16 | EKLYLVQGTQVYVFL  | 35,87 |                                 | Hemoglobin |
| C17 | VQGTQVYVFLTKGGY  | 26,6  |                                 | Hemoglobin |
| C18 | VYVFLTKGGYTLVSG  | 30,2  |                                 | Hemoglobin |
| C19 | TKGGYTLVSGYPKRL  | 33,21 |                                 | Hemoglobin |
| C20 | TLVSGYPKRLEKEVG  | 19,11 |                                 | Hemoglobin |
| C21 | YPKRLEKEVGTPHGI  | 18,27 |                                 | Hemoglobin |
| C22 | EKEVGTPHGIILDSV  | 8,29  |                                 | Hemoglobin |

|     |                 |       |                           |            |
|-----|-----------------|-------|---------------------------|------------|
| C23 | TPHGIILDSVDAAFI | 24,75 |                           | Hemoglobin |
| C24 | ILDSVDAAFICPGSS | 0,77  |                           | Hemoglobin |
| D1  | DAAFICPGSSRLHIM | 62,57 |                           | Hemoglobin |
| D2  | CPGSSRLHIMAGRRL | 84,25 |                           | Hemoglobin |
| D3  | RLHIMAGRRLWWLDL | 100   | RLHIMAGRRLWWLDLKSGAQATWTE | Hemoglobin |
| D4  | AGRRLWWLDLKSGAQ | 80,41 |                           | Hemoglobin |
| D5  | WWLDLKSGAQATWTE | 57,54 |                           | Hemoglobin |
| D6  | KSGAQATWTELPWPH | 51,04 |                           | Hemoglobin |
| D7  | ATWTELPWPHEKVDG | 43,29 |                           | Hemoglobin |
| D8  | LPWPHEKVDGALCME | 24    |                           | Hemoglobin |
| D9  | EKVDGALCMEKSLGP | 7,67  |                           | Hemoglobin |
| D10 | ALCMEKSLGPNSCSA | 5,99  |                           | Hemoglobin |
| D11 | KSLGPNSCSANGPGL | 16,15 |                           | Hemoglobin |
| D12 | NSCSANGPGLYLIHG | 29,43 |                           | Hemoglobin |
| D13 | NGPGLYLIHGPNLYC | 32,32 |                           | Hemoglobin |
| D14 | YLIHGPNLYCYSDVE | 34,96 |                           | Hemoglobin |
| D15 | PNLYCYSDVEKLNA  | 18,25 |                           | Hemoglobin |
| D16 | YSDVEKLNAAKALPQ | 6,32  |                           | Hemoglobin |
| D17 | KLNAAKALPQPQNV  | 31,52 |                           | Hemoglobin |
| D18 | KALPQPQNVTSLLGC | 3,79  |                           | Hemoglobin |
| D19 | LPQPQNVTSLLGCTH | 5,92  |                           | Hemoglobin |
| D20 | DREKLQERLAKLAG  | 21,8  |                           | Hemoglobin |
| D21 | QEVRYFCV        | 3,06  |                           | Hemoglobin |
| D22 | AVNFPNPPGKGGG   | 26,63 |                           | Hemoglobin |
| D23 | AVNFPNPPGKGGG   | 24,13 |                           | Hemoglobin |
| D24 | HPGSVNEFDF      | 23,57 |                           | Hemoglobin |

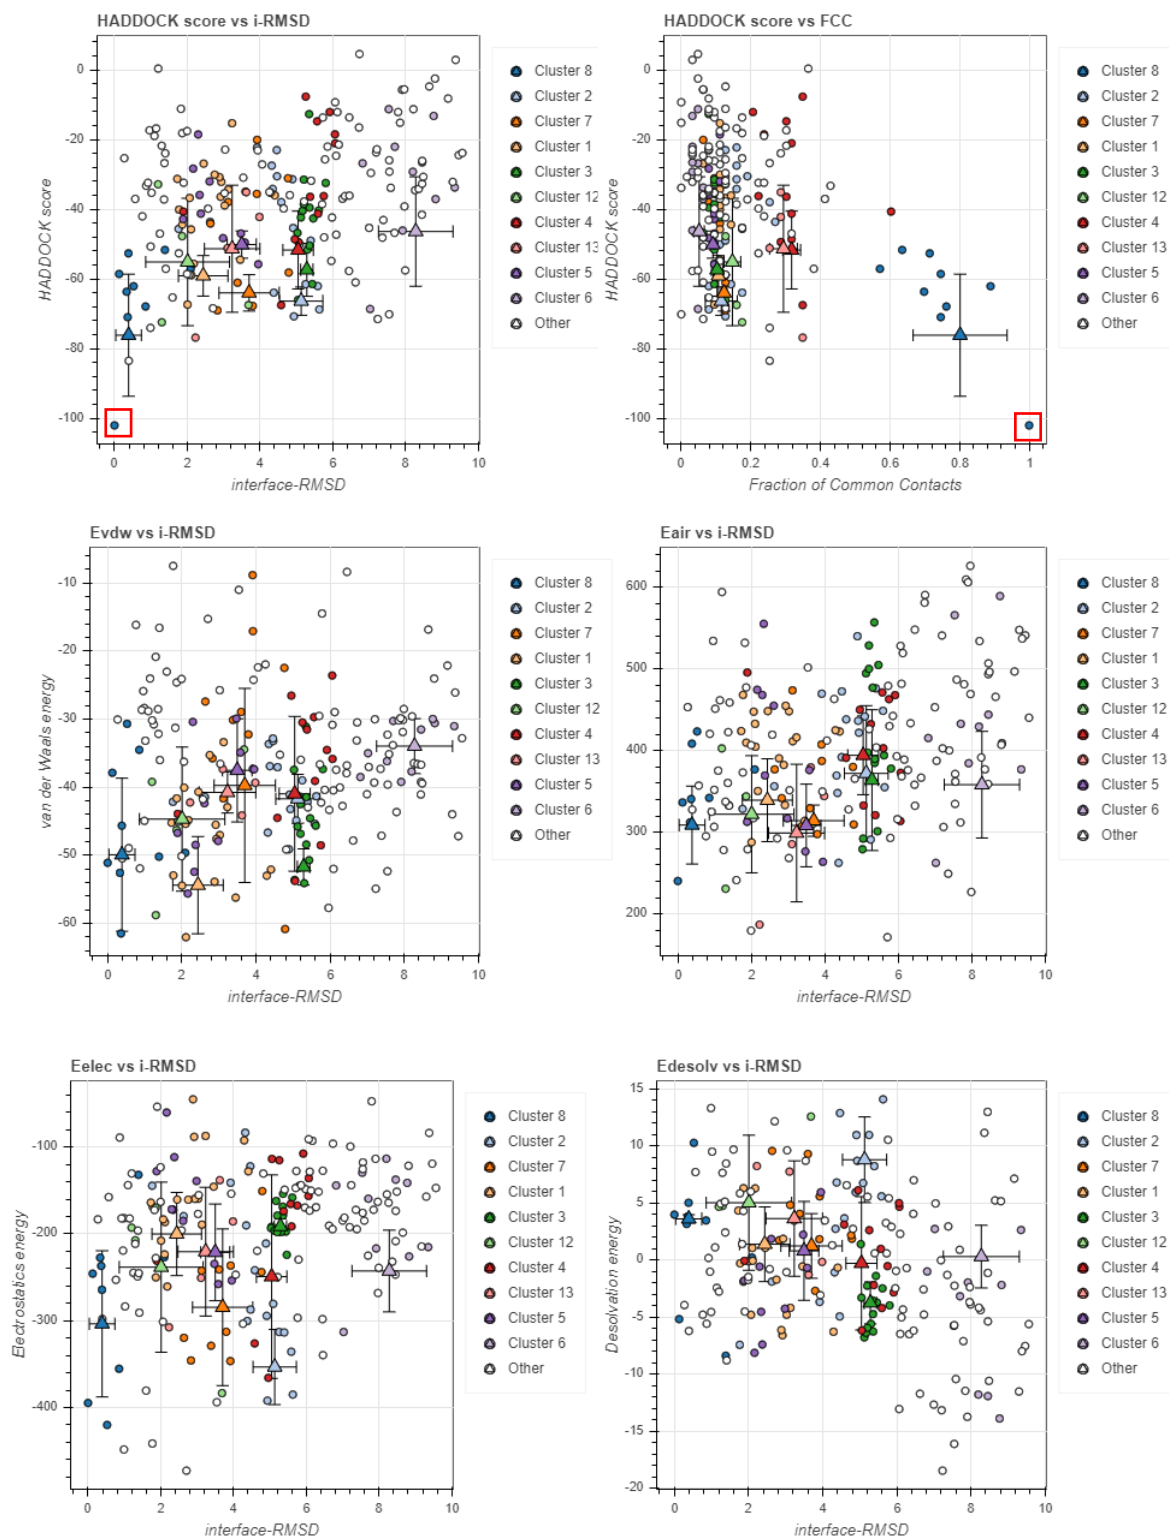

**Figure S1:** Interaction between hemopexin with hemoglobin. The simulation was performed by the server HADDOCK 2.4 (<https://wenmr.science.uu.nl/haddock2.4/>), generating 126 structures

represented by points in the graph presented in 13 clusters. Red squares represent the lowest energy structure.

**Table S2:** Biochemical and biophysical parameters and statistics of the 126 structures in 13 cluster(s), which represents 63 % of the water-refined models generated from HADDOCK webserver.

| <b>Cluster 8</b>                              |                 |
|-----------------------------------------------|-----------------|
| HADDOCK score                                 | -76.1 +/- 15.2  |
| Cluster size                                  | 9               |
| RMSD from the overall lowest-energy structure | 1.2 +/- 0.8     |
| Van der Waals energy                          | -49.9 +/- 9.7   |
| Electrostatic energy                          | -303.6 +/- 72.9 |
| Desolvation energy                            | 3.6 +/- 0.3     |
| Restraints violation energy                   | 308.7 +/- 41.3  |
| Buried Surface Area                           | 1742.0 +/- 50.1 |
| Z-Score                                       | -2.2            |
| <b>Cluster 2</b>                              |                 |
| HADDOCK score                                 | -66.4 +/- 3.5   |
| Cluster size                                  | 17              |
| RMSD from the overall lowest-energy structure | 4.4 +/- 0.4     |
| Van der Waals energy                          | -41.7 +/- 3.1   |
| Electrostatic energy                          | -353.3 +/- 37.5 |
| Desolvation energy                            | 8.8 +/- 3.3     |
| Restraints violation energy                   | 372.0 +/- 71.8  |
| Buried Surface Area                           | 1705.8 +/- 49.1 |
| Z-Score                                       | -1.0            |
| <b>Cluster 7</b>                              |                 |
| HADDOCK score                                 | -64.0 +/- 4.5   |
| Cluster size                                  | 10              |
| RMSD from the overall lowest-energy structure | 14.5 +/- 0.2    |
| Van der Waals energy                          | -39.7 +/- 12.3  |
| Electrostatic energy                          | -284.5 +/- 78.1 |
| Desolvation energy                            | 1.2 +/- 2.5     |
| Restraints violation energy                   | 314.1 +/- 16.6  |

|                                               |                  |
|-----------------------------------------------|------------------|
| Buried Surface Area                           | 1474.7 +/- 65.6  |
| Z-Score                                       | -0.7             |
| <b>Cluster 1</b>                              |                  |
| HADDOCK score                                 | -59.1 +/- 5.0    |
| Cluster size                                  | 19               |
| RMSD from the overall lowest-energy structure | 14.0 +/- 0.4     |
| Van der Waals energy                          | -54.4 +/- 6.2    |
| Electrostatic energy                          | -200.1 +/- 41.5  |
| Desolvation energy                            | 1.4 +/- 2.8      |
| Restraints violation energy                   | 339.2 +/- 43.9   |
| Buried Surface Area                           | 1409.2 +/- 51.1  |
| Z-Score                                       | -0.2             |
| <b>Cluster 3</b>                              |                  |
| HADDOCK score                                 | -57.4 +/- 6.6    |
| Cluster size                                  | 14               |
| RMSD from the overall lowest-energy structure | 13.7 +/- 0.5     |
| Van der Waals energy                          | -51.7 +/- 2.3    |
| Electrostatic energy                          | -191.4 +/- 7.8   |
| Desolvation energy                            | -3.8 +/- 1.6     |
| Restraints violation energy                   | 363.8 +/- 74.6   |
| Buried Surface Area                           | 1655.9 +/- 48.3  |
| Z-Score                                       | 0.0              |
| <b>Cluster 12</b>                             |                  |
| HADDOCK score                                 | -55.1 +/- 15.8   |
| Cluster size                                  | 4                |
| RMSD from the overall lowest-energy structure | 10.3 +/- 0.6     |
| Van der Waals energy                          | -44.7 +/- 9.2    |
| Electrostatic energy                          | -238.3 +/- 84.8  |
| Desolvation energy                            | 5.0 +/- 5.1      |
| Restraints violation energy                   | 322.0 +/- 62.1   |
| Buried Surface Area                           | 1466.5 +/- 143.4 |
| Z-Score                                       | 0.3              |
| <b>Cluster 4</b>                              |                  |
| HADDOCK score                                 | -51.7 +/- 9.7    |
| Cluster size                                  | 12               |
| RMSD from the overall lowest-energy structure | 6.1 +/- 0.2      |
| Van der Waals energy                          | -41.0 +/- 9.8    |



|                                               |                  |
|-----------------------------------------------|------------------|
| Electrostatic energy                          | -249.3 +/- 101.5 |
| Desolvation energy                            | -0.3 +/- 5.1     |
| Restraints violation energy                   | 394.1 +/- 41.8   |
| Buried Surface Area                           | 1369.4 +/- 73.0  |
| Z-Score                                       | 0.7              |
| <b>Cluster 13</b>                             |                  |
| HADDOCK score                                 | -51.3 +/- 15.8   |
| Cluster size                                  | 4                |
| RMSD from the overall lowest-energy structure | 6.8 +/- 0.7      |
| Van der Waals energy                          | -40.8 +/- 2.6    |
| Electrostatic energy                          | -220.5 +/- 64.2  |
| Desolvation energy                            | 3.6 +/- 4.4      |
| Restraints violation energy                   | 299.0 +/- 72.9   |
| Buried Surface Area                           | 1385.0 +/- 88.9  |
| Z-Score                                       | 0.8              |
| <b>Cluster 5</b>                              |                  |
| HADDOCK score                                 | -50.1 +/- 3.4    |
| Cluster size                                  | 10               |
| RMSD from the overall lowest-energy structure | 15.0 +/- 0.3     |
| Van der Waals energy                          | -37.5 +/- 6.6    |
| Electrostatic energy                          | -221.3 +/- 48.2  |
| Desolvation energy                            | 0.8 +/- 3.8      |
| Restraints violation energy                   | 308.3 +/- 43.8   |
| Buried Surface Area                           | 1535.2 +/- 128.9 |
| Z-Score                                       | 0.9              |
| <b>Cluster 6</b>                              |                  |
| HADDOCK score                                 | -46.4 +/- 13.6   |
| Cluster size                                  | 10               |
| RMSD from the overall lowest-energy structure | 8.1 +/- 0.8      |
| Van der Waals energy                          | -34.0 +/- 3.5    |
| Electrostatic energy                          | -242.8 +/- 40.8  |
| Desolvation energy                            | 0.3 +/- 2.4      |
| Restraints violation energy                   | 358.2 +/- 56.5   |
| Buried Surface Area                           | 1278.2 +/- 61.4  |
| Z-Score                                       | 1.3              |

**Table S3:** Prediction of Hot spot interactions between Hemopexin and Hemoglobin  $\beta$ -chain using bioinformatics ([https://mitchell-web.ornl.gov/KFC\\_Server/](https://mitchell-web.ornl.gov/KFC_Server/)).

| Chain          | Res        | Num        | KFC2-A KFC2-A  |             |
|----------------|------------|------------|----------------|-------------|
|                |            |            | Class          | Conf        |
| A - Hemopexin  | TRP        | 314        | -----          | -2.29       |
| A - Hemopexin  | HIS        | 353        | -----          | -0.36       |
| A - Hemopexin  | PRO        | 367        | -----          | -2.50       |
| A - Hemopexin  | GLY        | 368        | -----          | -2.05       |
| A - Hemopexin  | SER        | 369        | -----          | -1.44       |
| A - Hemopexin  | <b>SER</b> | <b>370</b> | <b>Hotspot</b> | 0.12        |
| A - Hemopexin  | <b>ARG</b> | <b>371</b> | <b>Hotspot</b> | <b>0.66</b> |
| A - Hemopexin  | <b>TRP</b> | <b>382</b> | <b>Hotspot</b> | <b>1.09</b> |
| A - Hemopexin  | LEU        | 383        | -----          | -0.69       |
| A - Hemopexin  | <b>ASP</b> | <b>384</b> | <b>Hotspot</b> | 0.91        |
| A - Hemopexin  | LYS        | 386        | -----          | -0.86       |
| A - Hemopexin  | SER        | 387        | -----          | -1.10       |
| A - Hemopexin  | ALA        | 389        | -----          | -1.92       |
| A - Hemopexin  | GLN        | 390        | -----          | -1.69       |
| A - Hemopexin  | ALA        | 391        | -----          | -1.35       |
| A - Hemopexin  | <b>THR</b> | <b>392</b> | <b>Hotspot</b> | 1.24        |
| A - Hemopexin  | TRP        | 393        | -----          | -0.28       |
| A - Hemopexin  | <b>THR</b> | <b>394</b> | <b>Hotspot</b> | 1.26        |
| A - Hemopexin  | GLU        | 395        | -----          | -1.63       |
| A - Hemopexin  | LEU        | 396        | -----          | -0.01       |
| A - Hemopexin  | PRO        | 397        | -----          | -1.54       |
| A - Hemopexin  | GLU        | 440        | -----          | -1.66       |
| A - Hemopexin  | ASN        | 443        | -----          | -1.05       |
| A - Hemopexin  | ALA        | 444        | -----          | -2.44       |
| B - Hemoglobin | TRP        | 15         | -----          | -2.93       |
| B - Hemoglobin | ASP        | 21         | -----          | -2.95       |
| B - Hemoglobin | SER        | 44         | -----          | -1.71       |
| B - Hemoglobin | PRO        | 58         | -----          | -2.23       |
| B - Hemoglobin | LYS        | 59         | -----          | -0.35       |
| B - Hemoglobin | ALA        | 62         | -----          | -1.30       |
| B - Hemoglobin | HIS        | 63         | -----          | -1.80       |
| B - Hemoglobin | <b>LYS</b> | <b>65</b>  | <b>Hotspot</b> | <b>0.35</b> |
| B - Hemoglobin | <b>LYS</b> | <b>66</b>  | <b>Hotspot</b> | <b>1.77</b> |
| B - Hemoglobin | GLY        | 69         | -----          | -0.02       |
| B - Hemoglobin | ALA        | 70         | -----          | -1.75       |
| B - Hemoglobin | SER        | 72         | -----          | -0.88       |
| B - Hemoglobin | <b>ASP</b> | <b>73</b>  | <b>Hotspot</b> | 0.22        |
| B - Hemoglobin | ALA        | 76         | -----          | -1.52       |
| B - Hemoglobin | HIS        | 77         | -----          | -1.69       |

|                |            |           |                |             |
|----------------|------------|-----------|----------------|-------------|
| B - Hemoglobin | GLY        | 83        | -----          | -2.21       |
| B - Hemoglobin | <b>THR</b> | <b>84</b> | <b>Hotspot</b> | 0.27        |
| B - Hemoglobin | <b>THR</b> | <b>87</b> | <b>Hotspot</b> | 0.06        |
| B - Hemoglobin | <b>LEU</b> | <b>88</b> | <b>Hotspot</b> | <b>0.93</b> |
| B - Hemoglobin | GLU        | 90        | -----          | -1.39       |
| B - Hemoglobin | LEU        | 91        | -----          | -0.64       |
| B - Hemoglobin | LYS        | 95        | -----          | -1.14       |
| B - Hemoglobin | LEU        | 96        | -----          | -2.46       |

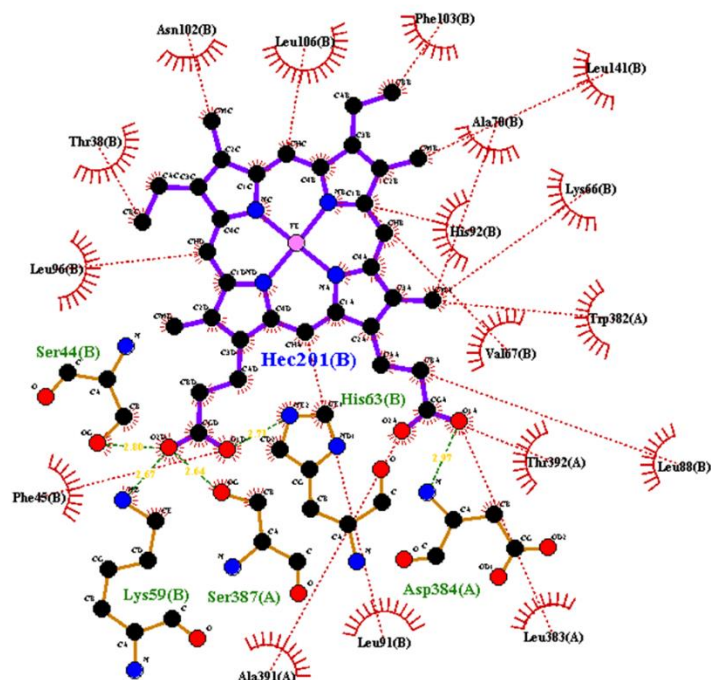

Supplement: s1 [file s1]
